# Supplementary material for: Effects of magnetism and size of nano-oxide inclusions on the thermoelectric properties of Ge0.96Bi0.06Te
Source: Royal Society of Chemistry journal article supplement (doi:10.1039/d2ta08403a), 2022-12-08
Supplement: d2ta08403a1.pdf [file d2ta08403a1.pdf]

## Supplementary information

### Effects of magnetism and size of nano-oxide inclusions on the thermoelectric properties of $\text{Ge}_{0.96}\text{Bi}_{0.06}\text{Te}$

Can Zhu,<sup>a</sup> Jian Wang,<sup>a</sup> Xinqiang Zhu,<sup>a</sup> Shun Zhang,<sup>a</sup> Feng Xu,<sup>a</sup> Feng Luo,<sup>a</sup> Jiafu Wang,<sup>a,b</sup> Yan Zhang,<sup>c,d</sup> Hongxia Liu,<sup>c,d,\*</sup> and Zhigang Sun<sup>a,c,d,\*</sup>

<sup>a</sup> *State Key Laboratory of Advanced Technology for Materials Synthesis and Processing, Wuhan University of Technology, Wuhan 430070, China.*

<sup>b</sup> *School of Science, Wuhan University of Technology, Wuhan 430070, China.*

<sup>c</sup> *School of Materials Science and Engineering, Taiyuan University of Science and Technology, Taiyuan 030024, China.*

<sup>d</sup> *Laboratory of Magnetic and Electric Functional Materials and the Applications, The Key Laboratory of Shanxi Province, Taiyuan 030024, China.*

\* Corresponding author.

E-mail address: sun\_zg@whut.edu.cn (Prof. Zhigang Sun) and hongxliu@126.com (Dr. Hongxia Liu)

**Table S1** Weight ratio of nanoparticles (NPs), density ( $\rho$ ), and number density of nanoparticles ( $N_{\text{NP}}$ ) of composites regarding the NPs' type, size, and mole ratio.

| sample name | wt%  | $\rho$ (g cm <sup>-3</sup> ) | $N_{\text{NP}}$ (m <sup>-3</sup> ) |
|-------------|------|------------------------------|------------------------------------|
| matrix      |      | 6.07                         | -                                  |
| GT30-1      | 0.38 | 6.06                         | $3.48 \times 10^{20}$              |
| GT30-2      | 0.76 | 6.05                         | $6.91 \times 10^{20}$              |
| GT30-3      | 1.14 | 6.02                         | $1.03 \times 10^{21}$              |
| GT100-1     | 0.38 | 6.07                         | $8.44 \times 10^{18}$              |
| GT100-2     | 0.76 | 6.05                         | $1.68 \times 10^{19}$              |
| GT100-3     | 1.14 | 5.97                         | $2.47 \times 10^{19}$              |
| GF30-0.2    | 0.22 | 6.05                         | $2.53 \times 10^{20}$              |
| GF30-0.5    | 0.55 | 6.00                         | $6.26 \times 10^{20}$              |
| GF30-0.8    | 0.88 | 6.01                         | $1.00 \times 10^{21}$              |
| GF30-1      | 1.10 | 6.03                         | $1.25 \times 10^{21}$              |
| GF30-1.5    | 1.65 | 6.01                         | $1.86 \times 10^{21}$              |
| GF30-2      | 2.21 | 5.96                         | $2.45 \times 10^{21}$              |
| GF30-3      | 3.31 | 5.89                         | $3.59 \times 10^{21}$              |
| GF100-1     | 1.10 | 6.05                         | $1.70 \times 10^{19}$              |
| GF100-2     | 2.21 | 6.10                         | $3.40 \times 10^{19}$              |
| GF100-3     | 3.31 | 6.01                         | $4.97 \times 10^{19}$              |

**Table S2** Gaussian fitting values of the size distribution for the various raw nanoparticles and  $d$  means the diameter based on a sphere model.

| raw nanoparticle                      | mean $d$ (nm) | standard deviation (nm) | median $d$ (nm) | total number | Gauss $R$ -square |
|---------------------------------------|---------------|-------------------------|-----------------|--------------|-------------------|
| 30 nm TiO <sub>2</sub>                | 30.94         | 10.46                   | 29.99           | 387          | 0.9092            |
| 100 nm TiO <sub>2</sub>               | 106.95        | 43.95                   | 102.61          | 262          | 0.9653            |
| 30 nm Fe <sub>3</sub> O <sub>4</sub>  | 26.86         | 7.30                    | 26.19           | 225          | 0.9562            |
| 100 nm Fe <sub>3</sub> O <sub>4</sub> | 112.62        | 42.09                   | 107.64          | 272          | 0.9618            |

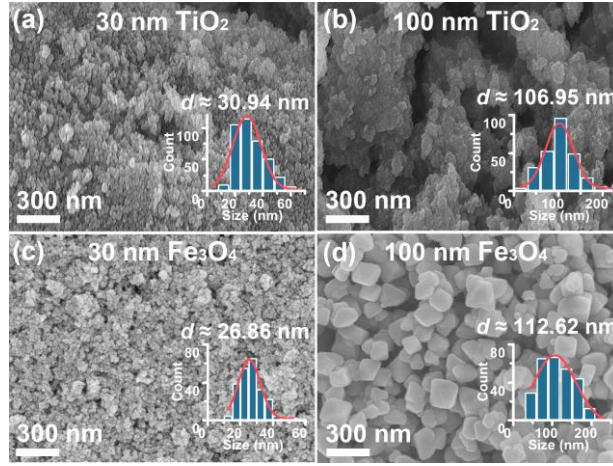

**Fig.S1** SEM images of the raw (a) 30 nm TiO<sub>2</sub>, (b) 100 nm TiO<sub>2</sub>, (c) 30 nm Fe<sub>3</sub>O<sub>4</sub>, and (d) 100 nm Fe<sub>3</sub>O<sub>4</sub> particles. The insets show the particle size distribution and average diameter of various raw nanoparticles.

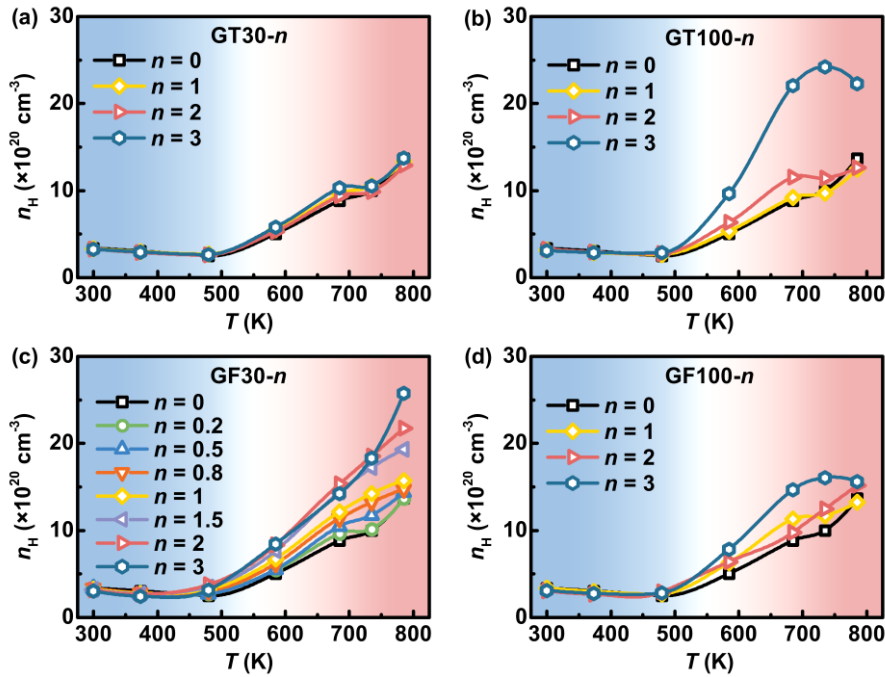

**Fig.S2** Temperature-dependent carrier concentration ( $n_H$ ) of (a) GT30- $n$ , (b) GT100- $n$ , (c) GF30- $n$ , and (d) GF100- $n$  composites calculated from the composites' experimental values of electrical conductivity ( $\sigma$ ) and Seebeck coefficient ( $S$ ) and the Ge<sub>0.96</sub>Bi<sub>0.06</sub>Te matrix's assumed values of the effective mass ( $m^*$ )<sup>1</sup> based on the single parabolic band (SPB) model.

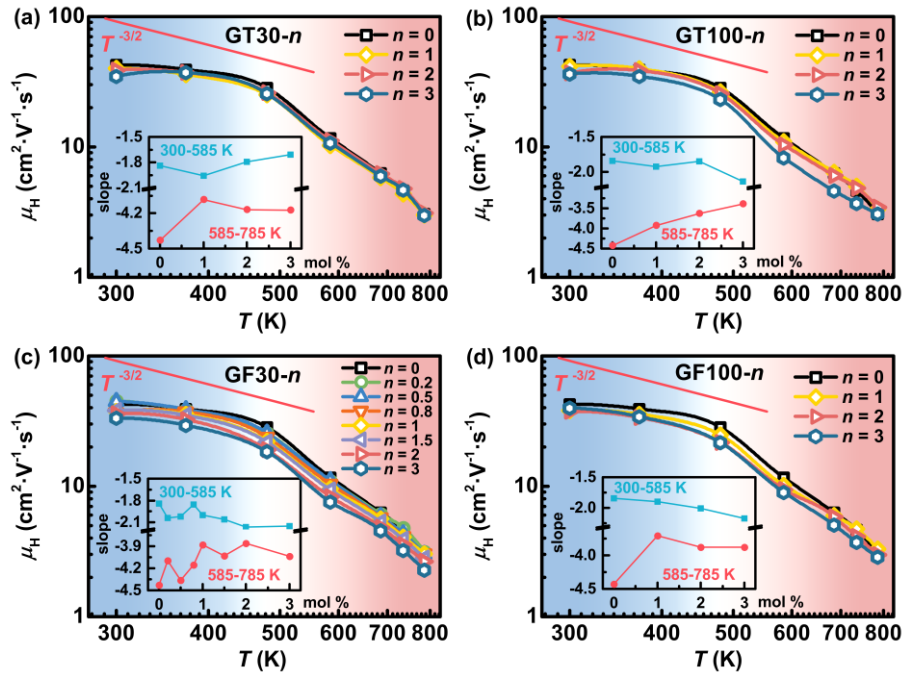

**Fig.S3** Temperature-dependent logarithmic scale Hall mobility ( $\mu_H$ ) of (a) GT30- $n$ , (b) GT100- $n$ , (c) GF30- $n$ , and (d) GF100- $n$  composites calculated from the composites' experimental values of  $\sigma$  and  $S$  and the matrix's assumed values of  $m^{*1}$  based on the SPB model.

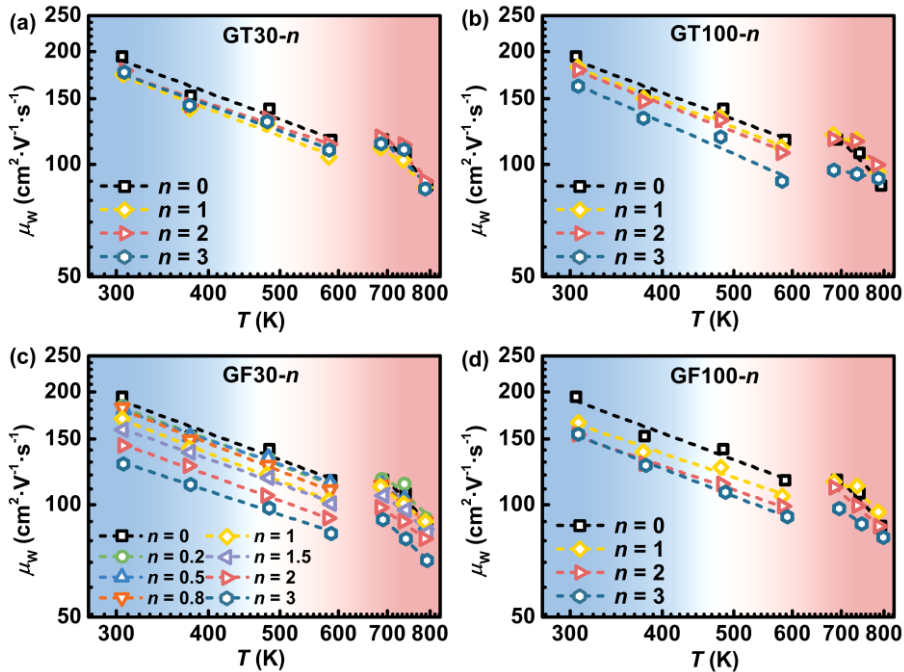

**Fig.S4** Temperature-dependent logarithmic scale weighted mobility ( $\mu_w$ ) of (a) GT30- $n$ , (b) GT100- $n$ , (c) GF30- $n$ , and (d) GF100- $n$  composites.

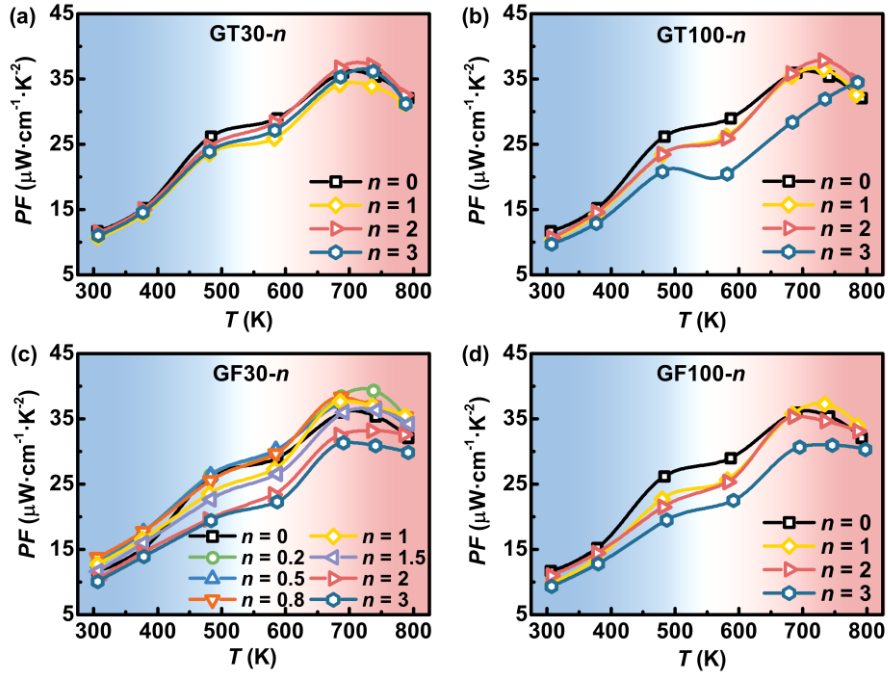

**Fig.S5** Temperature-dependent power factor ( $PF$ ) of (a) GT30- $n$ , (b) GT100- $n$ , (c) GF30- $n$ , and (d) GF100- $n$  composites.

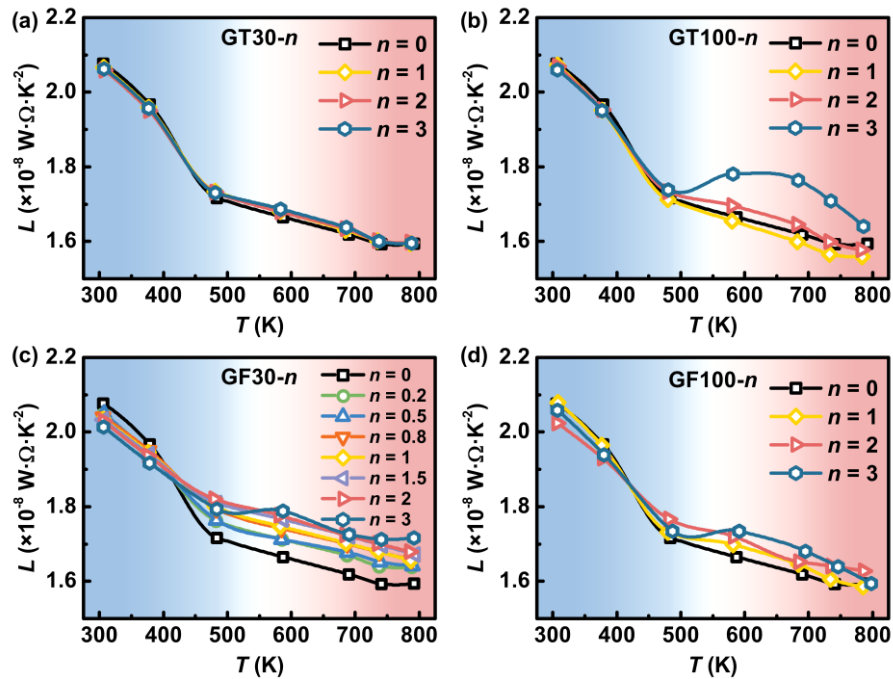

**Fig.S6** Temperature-dependent Lorenz number ( $L$ ) of (a) GT30- $n$ , (b) GT100- $n$ , (c) GF30- $n$ , and (d) GF100- $n$  composites.

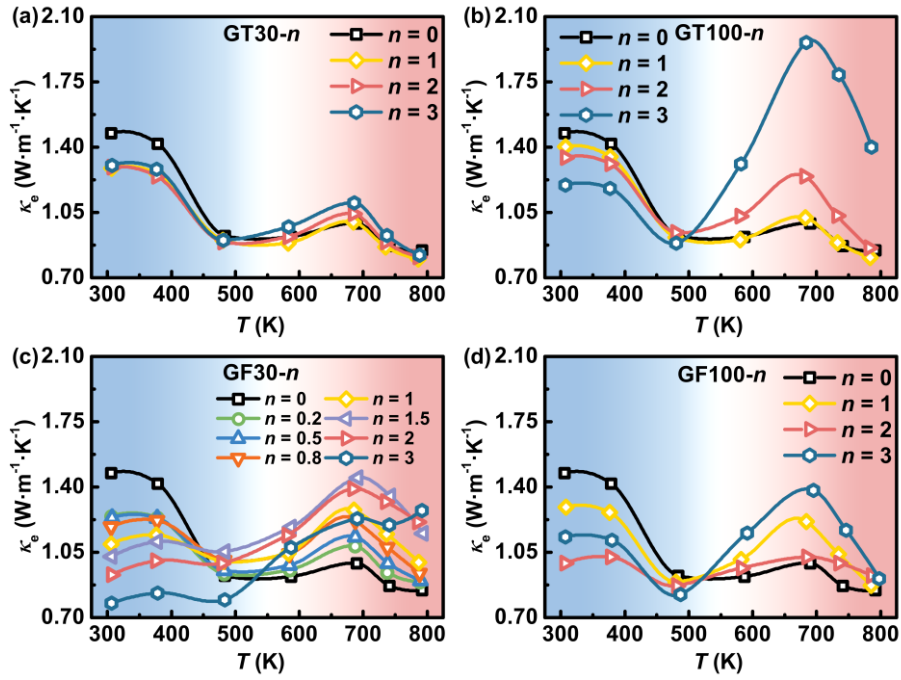

**Fig.S7** Temperature-dependent carrier thermal conductivity ( $\kappa_e$ ) of (a) GT30- $n$ , (b) GT100- $n$ , (c) GF30- $n$ , and (d) GF100- $n$  composites.

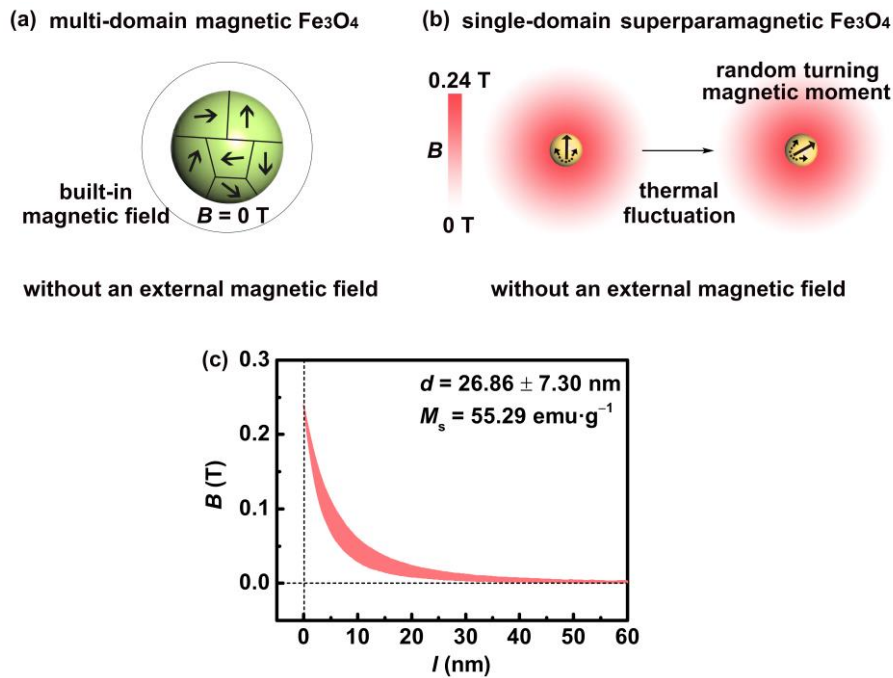

**Fig.S8** Built-in magnetic field ( $B$ ) introduced by (a) a multi-domain magnetic  $\text{Fe}_3\text{O}_4$  nanoparticle and (b) a single-domain superparamagnetic  $\text{Fe}_3\text{O}_4$  nanoparticle. (c) The relationship of the built-in magnetic field  $B$  of raw superparamagnetic  $\text{Fe}_3\text{O}_4$  nanoparticles and the distance from their surface ( $l$ ).

## Single parabolic band (SPB) model for calculating electronic transport parameters

Utilizing the single parabolic band (SPB) model with acoustic phonon scattering, the effective mass ( $m^*$ ) can be derived by:<sup>2</sup>

$$F_j(\eta) = \int_0^\infty \frac{\varepsilon^j}{1+\exp(\varepsilon-\eta)} d\varepsilon \quad (\text{S1})$$

$$S = \pm \frac{k_B}{e} \left[ \frac{(r+5/2)F_{r+3/2}(\eta)}{(r+3/2)F_{r+1/2}(\eta)} - \eta \right] \quad (\text{S2})$$

$$m^* = \frac{h^2}{2k_B T} \left[ \frac{n}{4\pi F_{r+1}(\eta)} \right]^{2/3} \quad (\text{S3})$$

where  $F_j(\eta)$  is the Fermi integral function and  $\eta$  is the reduced Fermi level ( $\eta = E_F/k_B T$ ), and  $k_B$  and  $h$  are the Boltzmann constant and Planck constant. The scattering factor  $r = -1/2$  is taken for the  $\text{Ge}_{0.96}\text{Bi}_{0.06}\text{Te}$  matrix due to the phonon-dominated scattering mechanism in GeTe-based materials.<sup>3</sup> According to the Mott equation of the relationship between the  $S$  and  $n$ ,<sup>4</sup>

$$S = \pm \left( \frac{8\pi^2 k_B^2}{3eh^2} \right) m^* T \left( \frac{\pi}{3n} \right)^{2/3} (r + 3/2) \quad (\text{S4})$$

since the nanoparticles are considered to have little influence on the band structure or the crystal structure of the matrix, the  $m^*$  can be treated as a constant, and the relationship between  $r$  and  $S$  of composites can be derived as:<sup>5</sup>

$$\frac{(r_{\text{composite}}+3/2)}{(r_{\text{matrix}}+3/2)} = \frac{S_{\text{composite}}}{S_{\text{matrix}}} \left( \frac{n_{\text{composite}}}{n_{\text{matrix}}} \right)^{2/3} \quad (\text{S5})$$

Then, the scattering factor of the composites can be obtained according to the values of the Seebeck coefficient and carrier concentration of the composites and the matrix.

Since both  $S$  and  $\sigma$  are the function of carrier concentration and are related to each other, the transport coefficients ( $\sigma_{E0}$ ) and the weighted mobility ( $\mu_W$ ) are introduced to describe the intrinsic transport properties of materials.<sup>3, 6</sup> They can be expressed as:

$$\sigma = \sigma_{E0} \ln(1 + e^\eta) \quad (\text{S6})$$

$$\sigma_{E0} = \frac{2^{9/2} e \pi (m_e k_B T)^{3/2}}{3h^3} \mu_W \quad (\text{S7})$$

The parameter  $\sigma_{E0}$  is a conductivity expression independent of the carrier concentration ( $n_H$ ), which excludes the error of the  $n_H$  in the Hall measurement. The  $\sigma_{E0}$  can be expressed by the  $\mu_W$ , which is closely related to the  $m^*$ . Therefore, the change in  $\mu_W$  can also explain the relationship between  $S$  and  $\sigma$ , and the  $\mu_W$  can initially reflect the scale of  $PF$ .

The  $L$  is the Lorenz number based on the SPB approximation:<sup>2, 7</sup>

$$L = \left(\frac{k_B}{e}\right)^2 \left\{ \frac{(r+7/2)F_{r+5/2}(\eta)}{(r+3/2)F_{r+1/2}(\eta)} - \left[ \frac{(r+5/2)F_{r+3/2}(\eta)}{(r+3/2)F_{r+1/2}(\eta)} \right]^2 \right\} \quad (S8)$$

### Langevin function fitting for superparamagnetic Fe<sub>3</sub>O<sub>4</sub> nanoparticles

To confirm that 30 nm Fe<sub>3</sub>O<sub>4</sub> NPs is indeed superparamagnetic, the experimental data of its  $M-H$  curve was fitted by the Langevin function.<sup>5, 8, 9</sup>

$$M = M_0 \left( \coth \left( \frac{\mu \mu_0 H}{k_B T} \right) - \frac{k_B T}{\mu \mu_0 H} \right) \quad (S9)$$

where the vacuum permeability  $\mu_0$  is  $4\pi \times 10^{-7} \text{ N A}^{-2}$ , the Boltzmann constant  $k_B$  is  $1.38 \times 10^{-23} \text{ J K}^{-1}$ , and the temperature  $T$  is 300 K. The fitting results show that the saturation magnetization intensity of 30 nm Fe<sub>3</sub>O<sub>4</sub> NPs is  $M_0 = 54.54 \text{ emu g}^{-1}$ , comparable with the  $M_s$ , as shown in **Fig.4b**. And the magnetic moment of a 30 nm Fe<sub>3</sub>O<sub>4</sub> NPs is  $\mu = 1.12 \times 10^{-17} \text{ A m}^2$ , which is related to the average volume  $\langle V \rangle$ :<sup>5, 8, 9</sup>

$$\mu = M_{s,\text{bulk}} \rho \langle V \rangle = M_{s,\text{bulk}} \rho \frac{\pi d^3}{6} \quad (S10)$$

where  $M_{s,\text{bulk}}$  is the saturation magnetization intensity of bulk Fe<sub>3</sub>O<sub>4</sub> ( $M_{s,\text{bulk}} = 90 \text{ emu g}^{-1}$ ).<sup>10</sup>

Thus, the average diameter  $d$  of 30 nm Fe<sub>3</sub>O<sub>4</sub> NPs obtained from the  $M-H$  curve is about 35.76 nm, close to the Gaussian analysis result of SEM (mean  $d = 26.86 \pm 7.30 \text{ nm}$ ), as shown in

**Table S2.**



## Built-in magnetic field introduced by a magnetic particle

Considering the built-in magnetic field introduced by one single-domain Fe<sub>3</sub>O<sub>4</sub> NP with a sphere model, the magnetic field  $B$  around the Fe<sub>3</sub>O<sub>4</sub> NP can be calculated as follows<sup>11, 12</sup>:

$$B = \frac{2J(d/2)^3}{3(l+d/2)^3} \quad (\text{S11})$$

where  $J$  is the saturated magnetic polarization intensity of 30 nm Fe<sub>3</sub>O<sub>4</sub> ( $J = \mu_0 M_s \rho = 0.36$  T),  $d$  is the diameter, and  $l$  is the distance from the sphere surface. The results are shown in **Fig.S8c**.

## References:

1. C. Zhu, J. Wang, F. Luo, S. Zhang, J. Wang, Y. Zhang, H. Liu and Z. Sun, *ACS Appl. Mater. Interfaces*, 2022, **14**, 38854–38864.
2. H. Naithani and T. Dasgupta, *ACS Appl. Energy Mater.*, 2020, **3**, 2200–2213.
3. N. H. Li, W. L. He, C. J. Li, G. W. Wang, G. Y. Wang, X. Y. Zhou and X. Lu, *J. Mater. Chem. A*, 2021, **9**, 2385–2393.
4. J. Youn, J. Ryu, H. Kim, S. K. Kihoi, I.-S. Son, S.-E. Chun, S. Yi and H. S. Lee, *Appl. Phys. Lett.*, 2021, **118**, 053902.
5. W. Y. Zhao, Z. Y. Liu, Z. G. Sun, Q. J. Zhang, P. Wei, X. Mu, H. Y. Zhou, C. C. Li, S. F. Ma, D. Q. He, P. X. Ji, W. T. Zhu, X. L. Nie, X. L. Su, X. F. Tang, B. G. Shen, X. L. Dong, J. H. Yang, Y. Liu and J. Shi, *Nature*, 2017, **549**, 247–251.
6. A. Suwardi, J. Cao, Y. Zhao, J. Wu, S. W. Chien, X. Y. Tan, L. Hu, X. Wang, W. Wang, D. Li, Y. Yin, W. X. Zhou, D. V. M. Repaka, J. Chen, Y. Zheng, Q. Yan, G. Zhang and J. Xu, *Mater. Today Phys.*, 2020, **14**, 100239.
7. H.-S. Kim, Z. M. Gibbs, Y. Tang, H. Wang and G. J. Snyder, *APL Mater.*, 2015, **3**, 041506.
8. C. C. Li, S. F. Ma, P. Wei, W. T. Zhu, X. L. Nie, X. H. Sang, Z. G. Sun, Q. J. Zhang and W. Y. Zhao, *Energy Environ. Sci.*, 2020, **13**, 535–544.
9. E. C. Devi and S. D. Singh, *J. Supercond. Nov. Magn.*, 2021, **34**, 617–622.
10. Y. Wei, B. Han, X. Hu, Y. Lin, X. Wang and X. Deng, presented in part at the 2011 Chinese Materials Conference, China, 2012.
11. S. Ma, C. Li, W. Cui, X. Sang, P. Wei, W. Zhu, X. Nie, F.-H. Sun, W. Zhao and Q. Zhang, *Sci. China Mater.*, 2021, **64**, 2835–2845.
12. F. Luo, C. Zhu, J. Wang, X. He, Z. Yang, S. Ke, Y. Zhang, H. Liu and Z. Sun, *ACS Appl. Mater. Interfaces*, 2022, **14**, 45503–45515.
